# Supplementary material for: Impact of Behavioral Assessment and Re-Test as Functional Trainings That Modify Survival, Anxiety and Functional Profile (Physical Endurance and Motor Learning) of Old Male and Female 3xTg-AD Mice and NTg Mice with Normal Aging
Source: MDPI journal article supplement (doi:10.3390/biomedicines10050973), 2022-04-22
Supplement: s1 [file s1]

## Supplementary data

Table S1. Physical performance in males and females Naïve 12-month-old 3xTg-AD and NTg mice.

| Functional Profile                             | Males                                    |                                                  | Females                                  |                                                 | Statistics                                                       |
|------------------------------------------------|------------------------------------------|--------------------------------------------------|------------------------------------------|-------------------------------------------------|------------------------------------------------------------------|
|                                                | NTg mice<br><i>n</i> =13<br>(Mean ± SEM) | 3xTg-AD mice<br><i>n</i> =19<br>(Mean ± SEM)     | NTg mice<br><i>n</i> =17<br>(Mean ± SEM) | 3xTg-AD mice<br><i>n</i> =14<br>(Mean ± SEM)    |                                                                  |
| Bodyweight                                     | 29.31 ± 0.56                             | 35.67 ± 1.79<br><i>p</i> = 0.039 <sup>s</sup>    | 27.15 ± 1.12                             | 33.93 ± 2.14<br><i>p</i> = 0.024 <sup>s</sup>   | <i>G</i> , <i>p</i> < 0.001***                                   |
| <b>Quantitative parameters of gait - Gait</b>  |                                          |                                                  |                                          |                                                 |                                                                  |
| Stride length (cm)                             | 5.00 ± 0.36                              | 4.25 ± 0.46                                      | 4.28 ± 0.35                              | 5.19 ± 0.26                                     | <i>GxS</i> , <i>p</i> = 0.037*                                   |
| Variability of stride length (%)               | 33.60 ± 3.00                             | 30.47 ± 3.59                                     | 30.28 ± 3.00                             | 19.53 ± 2.98                                    | <i>S</i> , <i>p</i> = 0.015*                                     |
| Speed (cm/s)                                   | 10.78 ± 2.10                             | 5.34 ± 1.01<br><i>p</i> = 0.018 <sup>s</sup>     | 8.10 ± 1.87                              | 6.71 ± 1.10                                     | <i>GxS</i> , <i>p</i> = 0.033*<br><i>S</i> , <i>p</i> = 0.015*   |
| Cadence (steps/s)                              | 3.76 ± 0.62                              | 1.86 ± 0.35<br><i>p</i> = 0.007 <sup>ss</sup>    | 3.28 ± 0.72                              | 1.52 ± 0.26                                     | <i>G</i> , <i>p</i> = 0.002**                                    |
| <b>Exploration and Neophobia – Corner test</b> |                                          |                                                  |                                          |                                                 |                                                                  |
| Horizontal activity ( <i>n</i> corners)        | 9.15 ± 0.85                              | 8.74 ± 1.32                                      | 9.13 ± 0.98                              | 9.58 ± 1.43                                     | <i>n.s.</i>                                                      |
| Vertical activity ( <i>n</i> rearings)         | 2.85 ± 0.89                              | 2.16 ± 0.59                                      | 2.13 ± 0.53                              | 2.36 ± 0.54                                     | <i>n.s.</i>                                                      |
| Rearing latency (s)                            | 39.46 ± 6.15                             | 32.31 ± 5.30                                     | 31.54 ± 4.74                             | 29.37 ± 5.26                                    | <i>n.s.</i>                                                      |
| Ratio (corners/rearings)                       | 2.02 ± 0.73                              | 2.53 ± 0.69                                      | 3.95 ± 0.93                              | 5.38 ± 1.26                                     | <i>S</i> , <i>p</i> = 0.015*                                     |
| Freezing (movement latency, s)                 | 0.94 ± 0.49                              | 5.69 ± 3.21                                      | 4.64 ± 3.73                              | 1.34 ± 0.65                                     | <i>n.s.</i>                                                      |
| <b>Response to gravity- Geotaxis</b>           |                                          |                                                  |                                          |                                                 |                                                                  |
| Geotaxis (latency, s)                          | 5.77 ± 0.65                              | 4.61 ± 0.64                                      | 4.61 ± 0.39                              | 6.21 ± 0.60                                     | <i>GxS</i> *                                                     |
| <b>Motor performance - Rotarod</b>             |                                          |                                                  |                                          |                                                 |                                                                  |
| Motor learning (latency, s)                    | 29.23 ± 6.58                             | 18.79 ± 4.55                                     | 45.53 ± 5.73                             | 32.00 ± 6.79                                    | <i>S</i> *                                                       |
| Motor learning - (trials learning)             | 2.54 ± 0.42                              | 3.37 ± 0.44                                      | 1.82 ± 0.35                              | 1.86 ± 0.27<br><i>p</i> = 0.010 <sup>z</sup>    | <i>S</i> , <i>p</i> = 0.004**                                    |
| Physical endurance (total latency, s)          | 216.35 ± 15.28                           | 144.03 ± 13.83<br><i>p</i> = 0.001 <sup>ss</sup> | 182.30 ± 9.99                            | 200.76 ± 13.50<br><i>p</i> = 0.014 <sup>z</sup> | <i>GxS</i> , <i>p</i> = 0.001** <sup>z</sup>                     |
| Day 1 (total latency, s)                       | 141.68 ± 15.25                           | 91.46 ± 9.05<br><i>p</i> = 0.020 <sup>s</sup>    | 116.49 ± 10.19                           | 122.40 ± 12.19                                  | <i>GxS</i> , <i>p</i> = 0.019*                                   |
| Day 2 (total latency, s)                       | 245.85 ± 18.40                           | 151.75 ± 18.47<br><i>p</i> = 0.001 <sup>ss</sup> | 206.91 ± 13.31                           | 213.79 ± 17.78                                  | <i>G</i> , <i>p</i> = 0.012*,<br><i>GxS</i> , <i>p</i> = 0.004** |
| Day 3 (total latency, s)                       | 261.53 ± 17.45                           | 188.89 ± 17.26<br><i>p</i> = 0.014 <sup>s</sup>  | 223.50 ± 12.91                           | 266.10 ± 17.71<br><i>p</i> = 0.006 <sup>z</sup> | <i>GxS</i> , <i>p</i> = 0.001**                                  |

*G*, Genotype effect, *G*\*\*\* *p* < 0.001, *G*\*\* *p* < 0.01, *G*\* *p* < 0.05, *n.s.* *p* > 0.05. *S*, Sex effect, *S*\*\*\* *p* < 0.001, *S*\*\* *p* < 0.01, *S*\* *p* < 0.05, *n.s.* *p* > 0.05. *GxS*, genotype and sex interaction effects, *GxS*\*\*\* *p* < 0.01, *GxS*\*\* *p* < 0.05, *GxS*\* *p* < 0.05, *n.s.* *p* > 0.05. Bonferroni *post hoc* test: *g*, genotype; *s*, sex; and *z* expressed genotype differences between sex, and *#* expressed sex differences between genotypes.

Table S2. Physical performance in males and female 3xTg-AD and NTg after Re-test to 16m.

| Functional Profile                      | Males                                    |                                                                                  | Females                                  |                                                  | Statistics                                                                    |                                                               |
|-----------------------------------------|------------------------------------------|----------------------------------------------------------------------------------|------------------------------------------|--------------------------------------------------|-------------------------------------------------------------------------------|---------------------------------------------------------------|
|                                         | NTg mice<br><i>n</i> =10<br>(Mean ± SEM) | 3xTg-AD mice<br><i>n</i> =14<br>(Mean ± SEM)                                     | NTg mice<br><i>n</i> =12<br>(Mean ± SEM) | 3xTg-AD mice<br><i>n</i> =9<br>(Mean ± SEM)      | ANOVA<br>(Retest)                                                             | MRA<br>(12m vs. 16m)                                          |
| Bodyweight                              | 29.09 ± 0.40                             | 33.63 ± 1.55<br><i>p</i> = 0.035 <sup>s</sup>                                    | 25.65 ± 0.78                             | 26.37 ± 0.80<br><i>p</i> < 0.001 <sup>‡</sup>    | <i>G</i> , <i>p</i> = 0.026*                                                  | <i>G</i> , <i>p</i> = 0.041*<br><i>S</i> , <i>p</i> = 0.003** |
| <i>S</i> , <i>p</i> < 0.001**           |                                          |                                                                                  |                                          |                                                  |                                                                               |                                                               |
| Quantitative parameters of gait - Gait  |                                          |                                                                                  |                                          |                                                  |                                                                               |                                                               |
| Stride length (cm)                      | 3.61 ± 0.41                              | 2.96 ± 0.49<br><i>p</i> = 0.023 <sup>s</sup>                                     | 3.03 ± 0.49                              | 4.63 ± 0.49                                      | <i>GxS</i> , <i>p</i> = 0.017*                                                | <i>n.s.</i>                                                   |
| Variability of stride length (%)        | 22.18 ± 4.23                             | 30.50 ± 5.53                                                                     | 27.61 ± 6.09                             | 18.53 ± 2.15                                     | <i>n.s.</i>                                                                   | <i>S</i> , <i>p</i> = 0.026*                                  |
| Speed (cm/s)                            | 6.85 ± 1.33                              | 2.69 ± 0.79<br><i>p</i> = 0.026 <sup>s</sup>                                     | 5.48 ± 1.31                              | 7.36 ± 1.35                                      | <i>GxS</i> , <i>p</i> = 0.042*                                                | <i>n.s.</i>                                                   |
| Cadence (steps/s)                       | 3.04 ± 0.53                              | 2.24 ± 0.36<br><i>p</i> = 0.004 <sup>s</sup>                                     | 2.83 ± 0.67                              | 2.39 ± 0.51                                      | <i>n.s.</i>                                                                   | <i>G</i> , <i>p</i> = 0.011*                                  |
| Exploration and Neophobia – Corner test |                                          |                                                                                  |                                          |                                                  |                                                                               |                                                               |
| Horizontal activity ( <i>n</i> corners) | 8.70 ± 1.88                              | 6.92 ± 1.48                                                                      | 6.82 ± 1.88                              | 11.56 ± 2.70                                     | <i>n.s.</i>                                                                   | <i>n.s.</i>                                                   |
| Vertical activity ( <i>n</i> corners)   | 1.50 ± 0.87                              | 0.38 ± 0.30                                                                      | 0.82 ± 0.64                              | 1.44 ± 0.56                                      | <i>n.s.</i>                                                                   | <i>n.s.</i>                                                   |
| Rearing latency (s)                     | 38.11 ± 7.77                             | 53.38 ± 2.83                                                                     | 51.48 ± 5.78                             | 36.70 ± 7.82                                     | <i>n.s.</i>                                                                   | <i>n.s.</i>                                                   |
| Ratio (corners/rearings)                | 2.95 ± 1.82                              | 1.19 ± 0.68                                                                      | 0.54 ± 0.42                              | 5.02 ± 2.02                                      | <i>GxS</i> , <i>p</i> = 0.037*<br><i>GxS</i> , <i>p</i> = 0.008 <sup>‡‡</sup> | <i>GxS</i> , <i>p</i> = 0.007**                               |
| Freezing (movement latency, s)          | 7.67 ± 5.87                              | 10.60 ± 6.88                                                                     | 11.19 ± 7.28                             | 0.88 ± 0.58                                      | <i>n.s.</i>                                                                   | <i>n.s.</i>                                                   |
| Response to gravity- Geotaxis           |                                          |                                                                                  |                                          |                                                  |                                                                               |                                                               |
| Geotaxis (latency, s)                   | 4.95 ± 0.83                              | 7.75 ± 1.03<br><i>p</i> = 0.042 <sup>r</sup>                                     | 6.61 ± 1.02                              | 5.87 ± 1.01                                      | <i>GxS</i> , <i>p</i> = 0.012*                                                | <i>n.s.</i>                                                   |
| Motor performance - Rotarod             |                                          |                                                                                  |                                          |                                                  |                                                                               |                                                               |
| Motor learning (latency, s)             | 39.00 ± 8.65                             | 56.64 ± 3.13<br><i>p</i> < 0.001 <sup>rrr</sup><br><i>p</i> = 0.025 <sup>s</sup> | 60.00 ± 0.00                             | 60.00 ± 0.00                                     | <i>G</i> , <i>p</i> = 0.042*,<br><i>GxS</i> , <i>p</i> = 0.042*               | <i>S</i> , <i>p</i> = 0.021*                                  |
| Motor learning (trials learning)        | 1.60 ± 0.26                              | 1.15 ± 0.10                                                                      | 1.00 ± 0.00                              | 1.00 ± 0.00<br><i>p</i> = 0.019 <sup>‡</sup>     | <i>S</i> , <i>p</i> = 0.07**                                                  | <i>S</i> , <i>p</i> = 0.024*                                  |
| Physical endurance (latency, s)         | 228.43 ± 10.27                           | 184.04 ± 15.60                                                                   | 209.64 ± 18.58                           | 257.94 ± 20.07<br><i>p</i> = 0.010 <sup>‡</sup>  | <i>GxS</i> , <i>p</i> = 0.005**                                               | <i>GxS</i> , <i>p</i> = 0.005**                               |
| Day 1 (total latency, s)                | 179.48 ± 14.89                           | 141.9 ± 11.29                                                                    | 176.63 ± 18.66                           | 188.15 ± 23.17                                   | <i>n.s.</i>                                                                   | <i>n.s.</i>                                                   |
| Day 2 (total latency, s)                | 250.09 ± 14.13                           | 189.44 ± 17.42                                                                   | 222.13 ± 21.83                           | 282.93 ± 27.78<br><i>p</i> = 0.008 <sup>‡‡</sup> | <i>GxS</i> , <i>p</i> = 0.003**                                               | <i>GxS</i> , <i>p</i> = 0.004**                               |
| Day 3 (total latency, s)                | 255.72 ± 11.86                           | 220.9 ± 20.71                                                                    | 229.87 ± 20.49                           | 302.76 ± 20.27<br><i>p</i> = 0.017 <sup>‡</sup>  | <i>GxS</i> , <i>p</i> = 0.006**                                               | <i>GxS</i> , <i>p</i> = 0.003**                               |

MRA, naïve 12m - retest 16m, ANOVA. *G*, Genotype effect, *G*\*\*\* *p* < 0.01, *G*\*\* *p* < 0.05, *G*\* *p* < 0.05, *n.s.* *p* > 0.05. *S*, Sex effect, *S*\*\*\* *p* < 0.01, *S*\*\* *p* < 0.05, *S*\* *p* < 0.05, *n.s.* *p* > 0.05. *GxS*, genotype and sex interaction effects, *GxS*\*\*\* *p* < 0.01, *GxS*\*\* *p* < 0.05, *GxS*\* *p* < 0.05, *n.s.* *p* > 0.05. Bonferroni *post hoc* test: *g*, genotype; *s*, sex; and \$ expressed genotype differences between sex, and # expressed sex differences between genotypes, and r expressed re-test differences between 12m and 16m in the same group.

Table S3. Physical performance in males and females Naïve 16-month-old 3xTg-AD and NTg mice.

| Functional Profile                             | Males                                                                                   |                                                                                    | Females                       |                                                                                   | Statistics                   |                                                                                                                        |
|------------------------------------------------|-----------------------------------------------------------------------------------------|------------------------------------------------------------------------------------|-------------------------------|-----------------------------------------------------------------------------------|------------------------------|------------------------------------------------------------------------------------------------------------------------|
|                                                | NTg mice<br><i>n</i> =12<br>(Mean ± SEM)                                                | 3xTg-AD mice<br><i>n</i> =12<br>(Mean ± SEM)                                       | NTg mice<br>-<br>(Mean ± SEM) | 3xTg-AD mice<br><i>n</i> =9<br>(Mean ± SEM)                                       | ANOVA<br>Naïve 16m           | ANOVA<br>Naïve vs. Retest                                                                                              |
| <b>Bodyweight</b><br><i>s, p &lt; 0.001***</i> | 31.53 ± 0.90                                                                            | 36.44 ± 1.81<br><i>p = 0.023<sup>s</sup></i>                                       | -                             | 26.90 ± 0.40<br><i>p &lt; 0.001<sup>z</sup></i>                                   | <b>G, <i>p</i> = 0.001**</b> | <b>R, <i>p</i> = 0.006**</b><br><b>g, <i>p</i> = 0.005<sup>ss</sup></b><br><b>s, <i>p</i> &lt; 0.001<sup>***</sup></b> |
| <b>Quantitative parameters of gait - Gait</b>  |                                                                                         |                                                                                    |                               |                                                                                   |                              |                                                                                                                        |
| Stride length (cm)                             | 4.59 ± 0.42                                                                             | 4.80 ± 0.50                                                                        | -                             | 4.51 ± 0.58                                                                       | <i>n.s.</i>                  | <i>N, p = 0.023<sup>r</sup></i><br><i>NxS, p = 0.047<sup>z</sup></i>                                                   |
| Variability of stride length (%)               | 25.53 ± 2.71                                                                            | 25.79 ± 3.92                                                                       | -                             | 20.25 ± 4.46<br><i>p = 0.026<sup>z</sup></i>                                      | <i>n.s.</i>                  | <i>S, p = 0.026<sup>z</sup></i>                                                                                        |
| Speed (cm/s)                                   | 3.54 ± 0.91                                                                             | 2.93 ± 0.47                                                                        | -                             | 5.72 ± 1.83                                                                       | <i>n.s.</i>                  | <i>G, p = 0.022<sup>s</sup></i><br><i>S, p = 0.014<sup>z</sup></i>                                                     |
| Cadence (steps/s)                              | 1.24 ± 0.16<br><i>p = 0.037<sup>r</sup></i>                                             | 0.80 ± 0.09                                                                        | -                             | 1.72 ± 0.67                                                                       | <i>n.s.</i>                  | <i>G, p = 0.001<sup>ss</sup></i><br><i>R, p = 0.016<sup>r</sup></i>                                                    |
| <b>Exploration and Neophobia – Corner test</b> |                                                                                         |                                                                                    |                               |                                                                                   |                              |                                                                                                                        |
| Horizontal activity ( <i>n</i> corners)        | 8.33 ± 0.80                                                                             | 10.25 ± 1.95                                                                       | -                             | 10.11 ± 2.62                                                                      | <i>n.s.</i>                  | <i>n.s.</i>                                                                                                            |
| Vertical activity ( <i>n</i> rearings)         | 2.58 ± 0.86                                                                             | 3.75 ± 1.11                                                                        | -                             | 1.33 ± 0.50                                                                       | <i>n.s.</i>                  | <i>N, p = 0.005<sup>ss</sup></i><br><i>N, p = 0.044<sup>z</sup></i><br><i>NxS, p = 0.023<sup>z</sup></i>               |
| Rearing latency (s)                            | 27.44 ± 7.23                                                                            | 32.69 ± 7.15                                                                       | -                             | 36.30 ± 7.90                                                                      | <i>n.s.</i>                  | <i>N, p = 0.022<sup>s</sup></i>                                                                                        |
| Ratio (corners/rearings)                       | 1.85 ± 0.51                                                                             | 1.44 ± 0.41                                                                        | -                             | 4.35 ± 2.22                                                                       | <i>n.s.</i>                  | <i>N, p = 0.039<sup>s</sup></i>                                                                                        |
| Freezing (movement latency, s)                 | 0.09 ± 0.09                                                                             | 1.04 ± 0.64                                                                        | -                             | 14.05 ± 8.70                                                                      | <i>n.s.</i>                  | <i>N, p = 0.013<sup>s</sup></i>                                                                                        |
| <b>Response to gravity- Geotaxis</b>           |                                                                                         |                                                                                    |                               |                                                                                   |                              |                                                                                                                        |
| Geotaxis (latency, s)                          | 5.47 ± 0.99                                                                             | 4.24 ± 0.49<br><i>p = 0.041<sup>r</sup></i>                                        | -                             | 8.21 ± 1.14                                                                       | <i>n.s.</i>                  | <i>GxR, p = 0.009**</i><br><i>GxS, p = 0.002**</i>                                                                     |
| <b>Motor performance – Rotarod</b>             |                                                                                         |                                                                                    |                               |                                                                                   |                              |                                                                                                                        |
| Motor learning (latency, s)                    | 44.08 ± 6.55                                                                            | 29.08 ± 6.99<br><i>p = 0.007<sup>mn</sup></i>                                      | -                             | 30.33 ± 8.34<br><i>p = 0.026<sup>n</sup></i><br><i>p &lt; 0.001<sup>***</sup></i> | <i>n.s.</i>                  | <i>GxR, p = 0.014<sup>s</sup></i>                                                                                      |
| Motor learning (trials learning)               | 1.58 ± 0.22                                                                             | 2.08 ± 0.28<br><i>p = 0.012<sup>n</sup></i>                                        | -                             | 3.00 ± 0.85<br><i>p = 0.022<sup>n</sup></i><br><i>p &lt; 0.001<sup>***</sup></i>  | <i>n.s.</i>                  | <i>R, p = 0.042<sup>s</sup></i><br><i>GxR, p = 0.042*</i>                                                              |
| Physical endurance (total latency, s)          | 177.62 ± 12.01<br><i>p &lt; 0.001<sup>aaa</sup></i><br><i>p &lt; 0.001<sup>mm</sup></i> | 189.27 ± 11.56<br><i>p = 0.001<sup>mn</sup></i>                                    | -                             | 206.58 ± 21.47<br><i>p = 0.001<sup>nn</sup></i><br><i>p = 0.001<sup>aa</sup></i>  | <i>n.s.</i>                  | <i>R, p &lt; 0.001<sup>sss</sup></i><br><i>R, p &lt; 0.001<sup>***</sup></i><br><i>S, p = 0.004<sup>zz</sup></i>       |
| Day 1 (total latency, s)                       | 110.09 ± 9.66                                                                           | 118.65 ± 9.31<br><i>p &lt; 0.001<sup>aaa</sup></i><br><i>p = 0.025<sup>n</sup></i> | -                             | 147.44 ± 24.10                                                                    | <i>n.s.</i>                  | <i>R, p = 0.006<sup>ss</sup></i><br><i>S, p = 0.022<sup>z</sup></i>                                                    |
| Day 2 (total latency, s)                       | 199.23 ± 16.02                                                                          | 208.43 ± 14.56<br><i>p &lt; 0.004<sup>aa</sup></i>                                 | -                             | 217.17 ± 23.20                                                                    | <i>n.s.</i>                  | <i>S, p = 0.017<sup>z</sup></i>                                                                                        |
| Day 3 (total latency, s)                       | 223.54 ± 17.86<br><i>p = 0.009<sup>aa</sup></i>                                         | 240.73 ± 15.31                                                                     | -                             | 255.13 ± 30.47<br><i>p = 0.013<sup>n</sup></i>                                    | <i>n.s.</i>                  | <i>R, p = 0.001<sup>ss</sup></i><br><i>R, p = 0.001<sup>zz</sup></i>                                                   |

$$p = 0.008^{***}$$

$$S, p = 0.011^{\#}$$

G, Genotype effect,  $G^* p < 0.05$ , *n.s.*  $p > 0.05$ . S, Sex effect,  $S^{***} p < 0.01$ ,  $S^{**} p < 0.05$ , *n.s.*  $p > 0.05$ . Bonferroni *post hoc* test: s, sex; and # expressed sex differences between genotypes; \$ expressed genotype differences between sex, and # expressed sex differences between genotypes; a expressed age differences in each group; r expressed re-test differences between 12m and 16m in the same group, and n expressed naïve differences between re-test 16m and naïve16m in the same group.

**Table S4: Statistics Figure 5C**

|                                                                                                                                                                                                                                                                                                                                                                                                                                                                                                                                                                                                                                                                                                                                                                                                                                                                                                                                                                                                                                                                                                                                                                                                                     |
|---------------------------------------------------------------------------------------------------------------------------------------------------------------------------------------------------------------------------------------------------------------------------------------------------------------------------------------------------------------------------------------------------------------------------------------------------------------------------------------------------------------------------------------------------------------------------------------------------------------------------------------------------------------------------------------------------------------------------------------------------------------------------------------------------------------------------------------------------------------------------------------------------------------------------------------------------------------------------------------------------------------------------------------------------------------------------------------------------------------------------------------------------------------------------------------------------------------------|
| Figure 5C.1<br>Males: MRA -ANOVA, Day-by-day1, $F(5,74) = 6.779$ , $p < 0.001$ , <i>post hoc</i> NTg naïve 12m vs. 3xTg-AD naïve 12m $p = 0.023$ , NTg naïve 16m vs. NTg re-test 16m $p = 0.012$ , 3xTg-AD naïve 12m vs. 3xTg-AD re-test 16m $p = 0.002$ . Genotype differences, MRA-ANOVA, $F(1,76) = 4.638$ , $p = 0.034$ . Re-test differences, MRA-ANOVA, $F(1,76) = 20.040$ , $p < 0.001$ .                                                                                                                                                                                                                                                                                                                                                                                                                                                                                                                                                                                                                                                                                                                                                                                                                    |
| Figure 5C.2<br>Males: MRA -ANOVA, Day-by-day 2, $F(5,73) = 5.078$ , $p < 0.001$ , <i>post hoc</i> naïve 12-month-old NTg vs. naïve 3xTg-AD 12m $p = 0.001$ . Genotype differences, MRA-ANOVA, $F(1,75) = 11.412$ , $p = 0.01$ .                                                                                                                                                                                                                                                                                                                                                                                                                                                                                                                                                                                                                                                                                                                                                                                                                                                                                                                                                                                     |
| Figure 5C.3<br>Males: MRA -ANOVA, Day-by-day 3, $F(5,73) = 2.733$ , $p = 0.026$ , <i>post hoc</i> naïve NTg 12m vs. naïve 3xTg-AD 12m $p = 0.028$ . Genotype differences, MRA-ANOVA, $F(1,75) = 4.480$ , $p = 0.038$ .                                                                                                                                                                                                                                                                                                                                                                                                                                                                                                                                                                                                                                                                                                                                                                                                                                                                                                                                                                                              |
| Figure 5C.4<br>Males: MRA -ANOVA, Trial-by-trial, $F(5,73) = 5.211$ , $p < 0.001$ . Genotype differences, MRA-ANOVA, $F(1,75) = 8.815$ , $p = 0.004$ . Re-test differences, MRA-ANOVA, $F(1,75) = 4.692$ , $p = 0.033$ .                                                                                                                                                                                                                                                                                                                                                                                                                                                                                                                                                                                                                                                                                                                                                                                                                                                                                                                                                                                            |
| Figure 5C.5<br>Females: MRA -ANOVA, Trial-by-trial, $F(4,65) = 3.137$ , $p = 0.021$ , <i>post hoc</i> NTg naïve 12m vs. 3xTg-AD re-test 16m $p = 0.009$ .                                                                                                                                                                                                                                                                                                                                                                                                                                                                                                                                                                                                                                                                                                                                                                                                                                                                                                                                                                                                                                                           |
| Figure 5C.6<br>Females: MRA -ANOVA, Day-by-day 1, $F(4,56) = 4.438$ , $p = 0.03$ , <i>post hoc</i> NTg naïve 12m vs. NTg re-test 16m $p = 0.028$ , NTg naïve 12m vs. re-test 3xTg-AD 16m $p = 0.025$ .                                                                                                                                                                                                                                                                                                                                                                                                                                                                                                                                                                                                                                                                                                                                                                                                                                                                                                                                                                                                              |
| Figure 5C.7<br>Females: MRA -ANOVA, Day-by-day 3, $F(4,56) = 2.701$ , $p = 0.040$ .                                                                                                                                                                                                                                                                                                                                                                                                                                                                                                                                                                                                                                                                                                                                                                                                                                                                                                                                                                                                                                                                                                                                 |
| Figure 6C.8<br>3xRg-AD: MRA -ANOVA, Trial-by-trial, Trial by trial: MRA-ANOVA, $F(5,71) = 5.586$ , $p < 0.001$ . Sex differences, MRA-ANOVA, $F(1,73) = 15.213$ , $p < 0.001$ . Re-test differences, MRA-ANOVA, $F(1,73) = 7.873$ , $p = 0.006$ .                                                                                                                                                                                                                                                                                                                                                                                                                                                                                                                                                                                                                                                                                                                                                                                                                                                                                                                                                                   |
| Figure 5C.9<br>3xTg-AD: MRA -ANOVA, Day-by-day 1, $F(5,71) = 5.424$ , $p < 0.001$ , <i>post hoc</i> females re-test 16m vs. naïve males 12m $p < 0.001$ , re-test females 16m vs. 16m naïve males $p = 0.042$ . Sex differences: MRA-ANOVA, $F(1,73) = 6.537$ , $p = 0.013$ . Re-test differences: MRA-ANOVA, $F(1,73) = 16.327$ , $p < 0.001$ .                                                                                                                                                                                                                                                                                                                                                                                                                                                                                                                                                                                                                                                                                                                                                                                                                                                                    |
| Figure 5C.10<br>3xTg-AD: MRA -ANOVA, Day-by-day 2, $F(5,71) = 4.694$ , $p = 0.001$ , <i>post hoc</i> females re-test 16m vs. naïve males 12m $p < 0.001$ , re-test females 16m vs. 16m naïve males $p = 0.036$ . Sex differences: MRA-ANOVA, $F(1,73) = 14.001$ , $p < 0.001$ . Re-test differences: MRA-ANOVA, $F(1,73) = 5.371$ , $p = 0.023$ .                                                                                                                                                                                                                                                                                                                                                                                                                                                                                                                                                                                                                                                                                                                                                                                                                                                                   |
| Figure 5C.11<br>3xTg-AD: MRA -ANOVA, Day-by-day 3, $F(5,71) = 4.077$ , $p = 0.003$ , <i>post hoc</i> females re-test 16m vs. naïve males 12m $p = 0.002$ . Sex differences: MRA-ANOVA, $F(1,73) = 13.723$ , $p < 0.001$ .                                                                                                                                                                                                                                                                                                                                                                                                                                                                                                                                                                                                                                                                                                                                                                                                                                                                                                                                                                                           |
| Figure 5C.12<br>Males - Day 1: T1, ANOVA, $F(5,74) = 4.931$ , $p = 0.001$ , <i>post hoc</i> naïve 3xTg-AD 12m vs. 3xTg-AD re-test 16m $p = 0.004$ ; Re-test differences, ANOVA, $F(1,78) = 18.084$ , $p < 0.001$ . T2, ANOVA, $F(5,74) = 4.260$ , $p = 0.002$ , <i>post hoc</i> naïve 3xTg-AD 12m vs. 3xTg-AD re-test 16m $p = 0.007$ ; Re-test differences, ANOVA, $F(1,78) = 18.307$ , $p < 0.001$ . T3, ANOVA, $F(5,74) = 3.981$ , $p = 0.003$ , <i>post hoc</i> naïve 3xTg-AD 12m vs. 3xTg-AD re-test 16m $p = 0.011$ ; Re-test differences, ANOVA, $F(1,78) = 12.376$ , $p = 0.001$ . T4, ANOVA, $F(5,74) = 5.452$ , $p < 0.001$ , <i>post hoc</i> NTg re-test 16m vs. naïve NTg 16m $p = 0.003$ , 3xTg-AD naïve 16m vs. NTg naïve 16m $p = 0.005$ ; Genotype differences, ANOVA, $F(1,78) = 11.578$ , $p = 0.001$ ; Re-test differences, ANOVA, $F(1,78) = 12.228$ , $p = 0.001$ . T5, ANOVA, $F(5,74) = 4.868$ , $p = 0.001$ , <i>post hoc</i> NTg re-test 16m vs. naïve NTg 16m $p = 0.016$ , 3xTg-AD naïve 12m vs. 3xTg-AD re-test 16m $p = 0.025$ ; Re-test differences, ANOVA, $F(1,78) = 16.546$ , $p < 0.001$ . T6, ANOVA, $F(5,74) = 5.916$ , $p < 0.001$ , <i>post hoc</i> 3xTg-AD naïve 12m vs. NTg |

naïve 12m  $p = 0.002$ , 3xTg-AD naïve 12m vs. 3xTg-AD re-test 16m  $p = 0.006$ ; Genotype differences, ANOVA  $F(1,78) = 8.355$ ,  $p = 0.005$ ; Re-test differences, ANOVA,  $F(1,78) = 11.347$ ,  $p = 0.001$ .

#### Figure 5C.13

Males - Day 2: T1, ANOVA,  $F(5,74) = 2.963$ ,  $p = 0.027$ , *post hoc* 3xTg-AD naïve 12m vs. NTg naïve 12m  $p = 0.017$ ; Genotype differences, ANOVA,  $F(1,78) = 4.168$ ,  $p = 0.045$ . T3, ANOVA,  $F(5,74) = 5.098$ , *post hoc* 3xTg-AD naïve 12m vs. NTg naïve 12m  $p = 0.002$ ; Genotype differences, ANOVA,  $F(1,78) = 8.601$ ,  $p = 0.004$ . T4, ANOVA,  $F(5,74) = 5.807$ ,  $p < 0.001$ , *post hoc* 3xTg-AD naïve 12m vs. NTg naïve 12m  $p = 0.001$ ; Genotype differences, ANOVA,  $F(1,78) = 12.959$ ,  $p = 0.001$ . T5, ANOVA,  $F(5,74) = 8.099$ ,  $p < 0.001$ , *post hoc* 3xTg-AD naïve 12m vs. NTg naïve 12m  $p < 0.001$ , 3xTg-AD re-test 16m vs. NTg re-test 16m  $p = 0.033$ , 3xTg-AD naïve 12m vs. 3xTg-AD naïve 16m  $p = 0.014$ ; Genotype differences, ANOVA,  $F(1,78) = 17.675$ ,  $p < 0.001$ . T6, Genotype differences, ANOVA,  $F(1,78) = 6.282$ ,  $p = 0.014$ .

#### Figure 5C.14

Males - Day 3: T1, ANOVA,  $F(5,74) = 3.075$ ,  $p = 0.014$ ; Genotype differences, ANOVA,  $F(1,78) = 6.477$ ,  $p = 0.013$ ; Re-test differences, ANOVA,  $F(1,78) = 6.616$ ,  $p = 0.012$ . T4, ANOVA,  $F(5,74) = 2.617$ ,  $p = 0.031$ , *post hoc* 3xTg-AD naïve 12m vs. NTg naïve 12m  $p = 0.026$ . T5, Genotype differences, ANOVA,  $F(1,78) = 5.066$ ,  $p = 0.027$ .

#### Figure 5C.15

Females - Day 1: T1, ANOVA,  $F(4,56) = 3.996$ ,  $p = 0.006$ , *post hoc* NTg naïve 12m vs. NTg re-test 16m  $p = 0.045$ . T2, ANOVA,  $F(4,56) = 4.477$ ,  $p = 0.003$ , *post hoc* NTg naïve 12m vs. NTg re-test 16m  $p = 0.015$ . T4, ANOVA,  $F(4,56) = 3.729$ ,  $p = 0.009$ , *post hoc* NTg naïve 12m vs. re-test NTg 16m  $p = 0.026$ . T5, ANOVA,  $F(4,56) = 2.809$ ,  $p = 0.034$ . T6, ANOVA,  $F(4,56) = 4.909$ ,  $p = 0.002$ , *post hoc* NTg naïve 12m vs. NTg re-test 16m  $p = 0.008$ .

#### Figure 5C.16

Females - Day 2: T1, ANOVA,  $F(4,56) = 2.588$ ,  $p = 0.046$ , *post hoc* 3xTg-AD naïve 12m vs. 3xTg-AD re-test 16m  $p = 0.028$ . T3, ANOVA,  $F(4,56) = 3.272$ ,  $p = 0.018$ .

#### Figure 5C.17

Females - Day 3: T3, ANOVA,  $F(4,56) = 2.606$ ,  $p = 0.045$ . T4, ANOVA,  $F(4,56) = 2.988$ ,  $p = 0.026$ . T5, ANOVA,  $F(4,56) = 3.025$ ,  $p = 0.025$ , *post hoc* 3xTg-AD retest 16m vs. NTg re-test 16m  $p = 0.045$ . T6, ANOVA,  $F(4,56) = 2.731$ ,  $p = 0.038$ , see figure 5C.

#### Figure 5C.18

3xTg-AD - Day 1, T1, ANOVA,  $F(5,71) = 4.431$ ,  $p = 0.001$ , *post hoc* female re-test 16m vs. Male naïve 12m  $p = 0.002$ ; Re-test differences, ANOVA,  $F(1,76) = 16.401$ ,  $p < 0.001$ . T2, ANOVA,  $F(5,71) = 4.372$ ,  $p = 0.002$ , *post hoc* female re-test 16m vs. male naïve 12m  $p = 0.004$ , female re-test 16m vs. male naïve 16m  $p = 0.050$ ; Re-test differences, ANOVA,  $F(1,76) = 15.013$ ,  $p < 0.001$ . T3, ANOVA,  $F(5,71) = 4.144$ ,  $p = 0.002$ , *post hoc* female re-test 16m vs. male naïve 12m  $p = 0.002$ ; Re-test differences, ANOVA,  $F(1,76) = 11.434$ ,  $p = 0.001$ . T4, ANOVA,  $F(5,71) = 2.572$ ,  $p = 0.034$ , *post hoc* female re-test 16m vs. male naïve 12m  $p = 0.035$ ; Sex differences, ANOVA,  $F(1,76) = 5.752$ ,  $p = 0.019$ ; Re-test differences, ANOVA,  $F(1,76) = 5.725$ ,  $p = 0.019$ . T5, ANOVA,  $F(1,76) = 4.794$ ,  $p = 0.001$ , *post hoc* female re-test 16m vs. male naïve 12m  $p = 0.042$ ; Sex differences, ANOVA,  $F(1,76) = 5.952$ ,  $p = 0.017$ ; Re-test differences, ANOVA,  $F(1,76) = 13.912$ ,  $p < 0.001$ . T6, ANOVA,  $F(5,71) = 5.723$ ,  $p < 0.001$ , *post hoc* female re-test 16m vs. male naïve 12m  $p < 0.001$ ; Sex differences, ANOVA,  $F(1,76) = 7.737$ ,  $p = 0.007$ ; Re-test differences, ANOVA,  $F(1,76) = 15.056$ ,  $p < 0.001$ .

#### Figure 5C.19

3xTg-AD - Day 2: T1, ANOVA,  $F(5,71) = 3.104$ ,  $p = 0.014$ , *post hoc* female re-test 16m vs. male naïve 12m  $p = 0.005$ ; Re-test differences, ANOVA,  $F(1,76) = 9.296$ ,  $p = 0.003$ . T2, Sex differences, ANOVA,  $F(1,76) = 6.607$ ,  $p = 0.012$ ; Re-test differences, ANOVA,  $F(1,76) = 4.183$ ,  $p = 0.044$ . T3, ANOVA,  $F(5,71) = 5.092$ ,  $p < 0.001$ , *post hoc* female re-test 16m vs. male naïve 12m  $p < 0.001$ , female re-test 16m vs. male re-test 16m  $p = 0.004$ ; Sex differences, ANOVA,  $F(1,76) = 16.280$ ,  $p < 0.001$ ; Re-test differences, ANOVA,  $F(1,76) = 4.017$ ,  $p = 0.049$ ; Sex differences, ANOVA,  $F(1,76) = 4.912$ ,  $p = 0.030$ . T4, ANOVA,  $F(5,71) = 4.043$ ,  $p = 0.003$ , *post hoc* female re-test 16m vs. male naïve 12m  $p = 0.001$ ; Sex differences, ANOVA,  $F(1,76) = 13.637$ ,  $p < 0.001$ . T5, ANOVA,  $F(5,71) = 5.511$ ,  $p < 0.001$ , *post hoc* female naïve 12m vs. male naïve 12m  $p = 0.015$ ; Sex differences, ANOVA,  $F(1,76) = 13.849$ ,  $p < 0.001$ . T6, ANOVA,  $F(5,71) = 3.529$ ,  $p = 0.007$ ; Sex differences, ANOVA,  $F(1,76) = 13.549$ ,  $p < 0.001$ .

#### Figure 5C.20

3xTg-AD - Day 3: T1, Sex differences, ANOVA,  $F(1,76) = 6.160$ ,  $p = 0.015$ . T2, ANOVA,  $F(1,76) = 6.384$ ,  $p = 0.014$ . T3, ANOVA,  $F(5,71) = 3.942$ ,  $p = 0.003$ , *post hoc* female naïve 12m vs. male naïve 12m  $p = 0.048$ , female re-test 16m vs. male naïve 12m  $p = 0.007$ ; Sex differences, ANOVA,  $F(1,76) = 13.021$ ,  $p = 0.001$ . T4, ANOVA,  $F(5,71) = 3.789$ ,  $p = 0.004$ , *post hoc* female naïve 12m vs. male naïve 12m  $p = 0.045$ , female re-test 16m vs. male naïve 12m  $p = 0.004$ ; Sex differences, ANOVA,  $F(1,76) = 10.172$ ,  $p = 0.002$ . T5, ANOVA,  $F(5,71) = 5.281$ ,  $p < 0.001$ , *post hoc* female naïve 12m vs. male naïve 12m  $p = 0.011$ , female re-test 16m vs. male naïve 12m  $p = 0.012$ ; Sex differences, ANOVA,  $F(1,76) = 18.229$ ,  $p < 0.001$ . T6, ANOVA,  $F(5,71) = 3.822$ ,  $p = 0.004$ , *post hoc* female re-test 16m vs. male naïve 12m  $p = 0.003$ ; Sex differences, ANOVA,  $F(1,76) = 14.803$ ,  $p < 0.001$ .
